# Supplementary material
Source: publisher figshare collection journal article supplement (https://gsapubs.figshare.com/ndownloader/files/25538828)
Supplement: Supplementary file 1 [file 25538828]

## Sheet: Sheet1
Sample	d13C	d18O	d44/40 Ca vs SW	d26/24 Mg vs DSM 3	d7Li vs LSVEC	Mg (mol/mol Ca)	Sr (mmol/mol Ca)	Mn (mmol/mol Ca)	Li (μmol/mol Ca)
M303-6.0	-4.49	-3.5		-1.22	1.03	0.84	0.34	5.48	1.81
M303-6.8	-4.95	-3.77	-1.05	-1.24	3.19	0.84	0.42	5.37	8.78
M303-36.6	-3.24	-2.71		-1.37	5.32	0.97	0.2	0.5	1.42
M303-37.4	-3.22	-3.19	-1.26	-1.4	3.55	0.97	0.25	0.54	1.21
M303-38.3	-3.09	-3.08		-1.33	5.85	0.97	0.23	0.72	0.72
M303-40.5	-2.13	-2.82	-1.33	-1.32	3	1	0.17	0.9	7.47
M303-41.4	-2.07	-2.87	-1.27	-1.45		0.98	0.16	0.87	1.35
M303-42.5	-2.03	-2.54	-1.3	-1.37	3.16	0.96	0.18	1.56	1.15
M303-43.6	-1.64	-3.26	-1.27	-1.44	2.2	0.99	0.17	1.4	1.87
M303-44.8	-1.43	-1.82	-1.12	-1.45	4.19	1.02	0.16	1.58	1.82
M303-45.9	-0.39	-3.31	-1.28	-1.5	3.5	0.93	0.14	1.37	1.23
M303-46.7	-1.89	-0.91	-1.32	-1.56	3.42	0.99	0.16	0.77	2.14
M303-48	-0.44	-1.83	-1.28	-1.36		0.98	0.24	1.04	0.15
M303-49	0.3	-1.88	-1.26	-1.35	6.35	0.99	0.14	0.89	0.97
M303-50.3	0.37	-2.07	-1.2	-1.4		0.97	0.17	1.37	0.9
M303-51.1	-0.13	2.26	-1.18	-1.57	7.79	0.99	0.15	0.92	2
M303-52	0.63	0.78	-1.14	-1.5	7.88	0.97	0.15	1.33	1.65
M303-53.7	0.51	-2.08	-1.14	-1.39	8.46	1.01	0.15	1.84	2.42
M303-54.5	0.72	0.54	-1.12	-1.61	7.22	1	0.15	2.24	2.04
M303-55.9	0.13	0.48	-1.01	-1.95	8.92	1	0.13	1.27	2.05
M303-57	0.42	1.62	-0.98	-1.78	9.59	0.98	0.13	1.65	1.46
M303-57.9	0.43	1.4	-0.78	-1.66	9.51	1	0.12	1.34	1.15
M303-59.2	1.21	2.17	-0.86	-1.72	9.22	1.01	0.14	1.99	1.83
M303-59.9	0.6	-0.02		-1.61	9.19	1.02	0.14	1.33	1.88
M303-62.5	0.83	-1.74	-0.65	-1.67	9.73	1	0.12	1.31	1.28
M303-63.3	0.87	-4.16	-0.89	-1.5	8.27	1	0.15	1.87	1.77
M303-67.3	0.87	-0.49	-0.78	-1.59	9.62	1.01	0.12	1.81	1.9
M303-68	0.96	-3.26	-0.77	-1.41	7.91	1	0.13	1.92	1.7
M303-69	0.72	-2.57	-0.85	-1.68		1.04	0.18	2.32	1.76
M303-70.7	0.63	-5.62	-0.6	-1.8	8.68	1.03	0.17	1.01	1.67
M303-71.1	0.54	-4.22		-1.68	8.4	1.04	0.18	0.99	1.82
M303-72.6	0.44	-5.74	-0.25	-1.8	9.52	1.02	0.24	0.45	1.69
M303-73.6	0.96	-1.21	-0.37	-1.88	11.31	0.99	0.32	0.48	1.4
M303-74.6	1.05	-1.38	-0.55			1.01	0.28	0.67	1.56
M303-75.6	1.06	-2.52		-1.74		1.01	0.25	0.5	0.53
M303-76.6	0.86	-2.94	-0.48	-1.7	11.96	1.05	0.24	0.56	1.35
M303-77.7	0.55	-6.03	-0.82	-1.69	9.85	1.01	0.22	0.61	1.31
M303-79.3	0.86	-1.57	-0.71	-1.76	8.32	1.01	0.28	0.57	1.09
M303.80.2	0.69	-4.35	-0.61	-1.61	12.04	1.03	0.29	0.56	0.74
M303-81.6	1.14	-2.1	-0.56	-1.69	12.73	1.01	0.32	0.35	1.96
M303-83.1	1.27	-1.43	-0.41	-1.85	8.49	1.03	0.29	0.15	1.65
M303-84.4	1.14	-3.19	-0.7	-1.91	5.94	1.06	0.18	0.12	0.5
M303-86.6	-0.34	-3.23			10.68	1	0.23	0.2	2.29
M303-88.6	-0.26	-8.45	-0.93	-1.13	8.04	0.97	0.13	0.38	1.64
M303-90.1	-0.27	-9.85	-0.94	-1.14	6.35	0.99	0.14	0.95	1.55
M303-92.6	-0.07	-1.59	-0.85	-1.06	8.48	0.92	0.21	0.49	0.69
M303-93.6	0.9	-8.64	-0.72	-1.53	3.96	0.99	0.23	0.51	1.12
M303-94.6	1.36	-7.55	-0.55	-1.5		1.02	0.17	0.39	0.83
M303-96.2	0.67	-11.29	-0.83	-1.27	8.12	1	0.12	0.83	0.97
M303-97.9	0.37	-11.63	-0.94	-1.23	7.71	0.98	0.1	0.52	1.48
M303-99.5	1.09	-12.17	-1.13	-0.91		0.95	0.1	3.25	10.01
M303-100.6	1.21	-12.48	-0.9	-0.95	6.07	0.99	0.08	1.67	0.62
M303-101.9	0.7	-11.62	-0.92	-1.27	8.55	0.99	0.13	0.72	0.86
M303-102.8	0.4	-11.68	-0.85	-1.16		0.97	0.09	0.78	0.38
M303-104.3	2.49	-12.86	-1.03	-0.85	6.17	0.98	0.07	1.3	0.69
M303-105.6	3.06	-13.39	-0.77	-0.57	4.98	0.97	0.11	1.45	0.5
M303-106.3	2.7	-13.17	-1.09	-0.68		0.96	0.08	1.79	0.57
M303-107.7	2.75	-12.92	-1.07	-0.94	7.56	1	0.07	1.78	0.7
M303-109.4	1.26	-11.99	-0.93	-0.99	7.25	1.01	0.1	0.83	0.44
M303-110.6	1.02	-12.59	-0.9	-1.04	7.52	0.96	0.06	0.44	1.41
M303-111.5	2.24	-13.13	-1.13	-0.87	6.3	1	0.09	3.28	0.65
M303-113.4	3.49	-12.86	-0.97	-0.62	6.79	0.97	0.09	1.95	0.56
M303-115.6	3.84	-13.12	-1.12	-0.71	5	0.97	0.06	1.84	1.81
M303-117.6	3.35	-12.22	-0.83	-1.28	8.2	1.01	0.12	0.47	8.78
M303-118.8	3.51	-11.85	-0.83	-1.6	8.25	0.99	0.09	0.5	1.42
M303-123.1	0.58	-5.1	-0.96	-1.2	9.6	0.95	0.13	0.34	1.21
M303-125.1			-0.99	-1.2	7.35	0.98	0.1	0.6	0.72
M303-125.7			-0.7	-1.3	7.19	0.98	0.11	0.66	7.47

## Sheet: G48213
Crockford, P., et al., 2021, Reconstructing Neoproterozoic seawater chemistry from early diagenetic dolomite: Geology, v. 49, https://doi.org/10.1130/G48213.1
